# Supplementary material for: Boundary Effects in the Diffusion of New Products on Cartesian Networks
Source: Atypon-hosted journal article supplement (doi:10.1287/opre.2022.0004), 2024-06-10
Supplement: opre.2022.0004.sm1.pdf [file opre.2022.0004.sm1.pdf]

## Additional Proofs and Further Details

### Appendix EC.1: Explicit lower bound for $f_{\text{bdry}}^{\mathbb{Z}^+ \times \mathbb{Z}^{D-1}}$

Previously, we introduced the discrete Bass model (26) on a one-sided line. We can similarly define *one-sided diffusion in  $D$  dimensions*, where peers effect can only be exerted in e.g., the negative direction of each coordinate. The discrete Bass model on the one-sided  $D$ -dimensional Cartesian network is given by

$$X_{\mathbf{j}}(0) = 0, \quad \mathbf{j} \in \mathbb{Z}^d, \quad (\text{EC.1a})$$

and for any  $\mathbf{j} \in \mathbb{Z}^d$ , as  $\Delta t \rightarrow 0$ ,

$$\mathbb{P}(X_{\mathbf{j}}(t + \Delta t) = 1 \mid \mathbf{X}(t)) = \begin{cases} \left(p + \frac{q}{D} N_{\mathbf{j}}^{1\text{-sided}}(t)\right) \Delta t, & \text{if } X_{\mathbf{j}}(t) = 0, \\ 1, & \text{if } X_{\mathbf{j}}(t) = 1, \end{cases} \quad (\text{EC.1b})$$

where

$$N_{\mathbf{j}}^{1\text{-sided}}(t) := \sum_{i=1}^D X_{\mathbf{j} + \hat{\mathbf{e}}_i}(t) \quad (\text{EC.1c})$$

is the number of adopters connected to  $\mathbf{j}$  in the one-sided case.

In 1D we saw that  $f_{\text{bdry}}^{\mathbb{Z}^+}(t; p, q) = f^{1\text{D}}(t; p, \frac{q}{2})$ , see (6). There is no similar explicit expression for  $f_{\text{bdry}}^{\mathbb{Z}^+ \times \mathbb{Z}^{D-1}}$ . In particular, we have

LEMMA EC.1. *Let  $f^{\text{D}, 1\text{-sided}}(t; p, q)$  denote the adoption level in the discrete Bass model (EC.1) on the one-sided  $D$ -dimensional Cartesian grid. Then*

$$f_{\text{bdry}}^{\mathbb{Z}^+ \times \mathbb{Z}^{D-1}} > f^{\text{D}, 1\text{-sided}}\left(t; p, \frac{q}{2}\right). \quad (\text{EC.2})$$

*Proof.* Start from the discrete Bass model (12) on  $\mathbb{Z}^+ \times \mathbb{Z}^{D-1}$ . If we delete all the directional edges  $(\mathbf{j}) \rightarrow (\mathbf{j} + \hat{\mathbf{e}}_i)$ , where  $i = 1, \dots, D$ , we obtain the one-sided  $D$ -dimensional discrete Bass model (EC.1), with  $q$  replaced by  $\frac{q}{2}$ . Since the deleted edges are influential to the boundary nodes  $j_1 \equiv 1$ , then by the *dominance principle* (Fibich et al. 2019),

$$f_{\text{bdry}}^{\mathbb{Z}^+ \times \mathbb{Z}^{D-1}}(t; p, q) > f_{\text{bdry}}^{\mathbb{Z}^+ \times \mathbb{Z}^{D-1}, 1\text{-sided}}\left(t; p, \frac{q}{2}\right).$$

If we now extend the one-sided network from  $\mathbb{Z}^+ \times \mathbb{Z}^{D-1}$  to  $\mathbb{Z}^D$ , the added edges are noninfluential to the nodes  $j_1 \equiv 1$ . Therefore,

$$f_{\text{bdry}}^{\mathbb{Z}^+ \times \mathbb{Z}^{D-1}, 1\text{-sided}}\left(t; p, \frac{q}{2}\right) = f_{(j_1=1, \mathbf{j}_{-1})}^{\mathbb{Z}^D, 1\text{-sided}}\left(t; p, \frac{q}{2}\right) = f^{\text{D}, 1\text{-sided}}\left(t; p, \frac{q}{2}\right),$$

where the last equality follows from translation invariance. Hence, the result follows.  $\square$

In order to express inequality (EC.2) using the two-sided Bass model on  $\mathbb{Z}^D$ , let us recall

CONJECTURE EC.1 (**Fibich et al. (2019)**). *The expected adoption level in the discrete Bass models (EC.1) and (1) on homogeneous  $D$ -dimensional one-sided and two-sided Cartesian networks on  $\mathbb{Z}^D$ , respectively, are identical, i.e.,  $f^{\text{D}, 1\text{-sided}}(t; p, q) = f^{\text{D}}(t; p, q)$ .*

Therefore, we have

COROLLARY EC.1. *Let Conjecture EC.1 hold. Then  $f_{\text{bdry}}^{\mathbb{Z}^+ \times \mathbb{Z}^{D-1}} > f^{\text{D}}(t; p, \frac{q}{2})$ .*

## Appendix EC.2: Global effect of an internal boundary

The global effect of internal boundaries is also  $O(\frac{1}{M})$ . To see that, we compute the difference  $h_M$  between the expected adoption level  $f^{[1, \dots, 2M]}$  on a two-sided line of length  $2M$  (Figure EC.1A), and the expected adoption level  $f^{[1, \dots, M | M+1, \dots, 2M]}$  on a two-sided line of length  $2M$  that has an internal boundary between nodes  $M$  and  $M+1$  (Figure EC.1B). Obviously,  $f^{[1, \dots, M | M+1, \dots, 2M]} \equiv f^{[1, \dots, M]}$ .

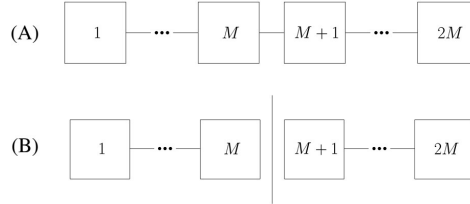

**Figure EC.1** Line of length  $2M$  without (A) and with (B) an internal boundary.

LEMMA EC.2. *Let*

$$h_M(t; p, q) := f^{[1, \dots, 2M]}(t; p, q) - f^{[1, \dots, M | M+1, \dots, 2M]}(t; p, q) \quad (\text{EC.3})$$

*denote the effect of an internal boundary on the aggregate adoption on a two-sided line of length  $2M$ .*

*Then*

$$h_M(t; p, q) \sim \frac{\psi(t; p, q)}{M}, \quad M \rightarrow \infty, \quad (\text{EC.4})$$

*where  $\psi$  is given by (11).*

*Proof.* Since  $f^{[1, \dots, 2M]} - f^{[1, \dots, M]} = (f^{1\text{D}} - f^{[1, \dots, M]}) - (f^{1\text{D}} - f^{[1, \dots, 2M]})$ , the result follows from Lemma 3.  $\square$

Figure EC.2A confirms numerically that the effect of an internal boundary decreases with  $M$ , and Figure EC.2B confirms that  $Mh_M \rightarrow \psi$  as  $M \rightarrow \infty$ , where  $\psi$  is independent of  $M$ , see (EC.4).

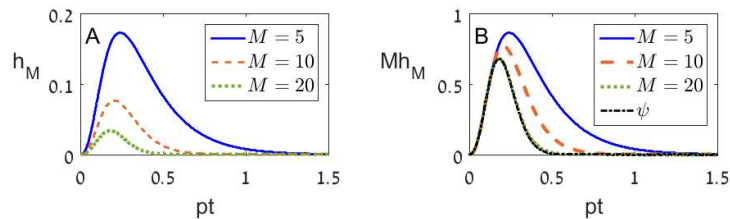

**Figure EC.2** (A) Effect of an internal boundary on the adoption level, see (EC.3), as a function of time, for various values of  $M$ . Here  $\frac{q}{p} = 100$ . (B) Same as (A) with  $Mh_M$  as a function of time. The line for  $M = 20$  is already indistinguishable from  $\psi$ , see (11).

### Appendix EC.3: Further details on the empirical analysis

The primary raw data for the empirical analysis consists of administrative data on residential rooftop solar installations acquired under a non-disclosure agreement from the Connecticut Green Bank. These include the date of the installation and address of the installation, along with several other variables we do not use in this study. The data include nearly all solar installations in Connecticut through the end of 2019. These data are supplemented with U.S. Census Bureau data at the Census block group level (a unit that contains between 600 and 3,000 people) from the 2015-2018 American Community Survey. For our study we use median household income, median number of rooms in owner-occupied households, median home values, population, and census block area.

We geocoded each of the addresses in the residential solar installation data using the Google Maps geocoding API (see <https://developers.google.com/maps/documentation/geocoding/overview>). This gives a latitude and longitude value for each solar installation. These are then input into ArcMap along with the date of the installation. We next identify each of the municipalities that had a Solarize campaign. Table EC.1 shows the start and end dates of the 51 municipality-level campaigns included in this analysis. See (Gillingham and Bollinger 2021) for a treatment effects analysis of the effectiveness of the campaigns at spurring further adoption of solar. As mentioned in the main text, we focus on examining the diffusion process after these campaigns because they provide a substantial exogenous increase in solar installations in one area, so we can follow how word-of-mouth and peer effects influence diffusion elsewhere. By focusing on municipalities with a reasonable number of solar installations, we can also improve our signal-to-noise ratio.

We use a Python script run in ArcMap to create buffer zones around each of the Solarize municipality boundaries. These are created within the Solarize municipality itself because we are analyzing the effect of external boundaries. We drop any boundaries where the adjacent municipality is also a Solarize municipality. Then we map the geocoded solar installations to the buffer zones. We

next calculate the sum of the installations in each buffer zone in the year following the Solarize campaigns.

For the Census data, we perform a join in ArcMap to overlay the U.S. Census block groups geographic areas with the buffers we created. Some block groups may not be entirely within the buffer zone. Thus, we calculate the percentage of the buffer zone covered by each block group and take a weighted average for each Census variable. For example, if there are two block group geographic areas in a buffer zone and 60% of the block group is covered by one block group and 40% another, we would take the weighted average based on these percentages. We create the dependent variable for our analysis by dividing the sum of the installations in each buffer zone by the number of owner-occupied households that we calculate are in each buffer zone.

The data for this analysis are at the municipality-buffer zone type level, where a buffer zone type refers to either being in the boundary buffer zone or the inner core zone. Table EC.2 shows the summary statistics for the cross-sectional data with 152 observations, where an observation is a municipality  $i$  zone category  $j \in \{\text{boundary buffer, inner core}\}$ . Thus, the analysis includes a total of 76 municipalities. As mentioned above, we excluded the borders where the municipality on the other side of the border is a Solarize municipality (i.e., we examine the border on the other side of the town from the border with the Solarize municipality).

## References

- Fibich G, Levin T, Yakir O (2019) Boundary effects in the discrete Bass model. *SIAM J. Appl. Math.* 79:914–937.
- Gillingham K, Bollinger B (2021) Social learning and solar photovoltaic adoption. *Management Science* 67:7091–7112.

**Table EC.1** Detailed Timeline of Solarize Campaigns

|                | Start Date    | End Date      |
|----------------|---------------|---------------|
| <u>Round 1</u> |               |               |
| Durham         | Sept 5, 2012  | Jan 14, 2013  |
| Westport       | Aug 22, 2012  | Jan 14, 2013  |
| Portland       | Sept 4, 2012  | Jan 14, 2013  |
| Fairfield      | Aug 28, 2012  | Jan 14, 2013  |
| <u>Round 2</u> |               |               |
| Bridgeport     | Mar 26, 2013  | July 31, 2013 |
| Coventry       | Mar 30, 2013  | July 31, 2013 |
| Canton         | Mar 19, 2013  | July 31, 2013 |
| Mansfield      | Mar 11, 2013  | July 31, 2013 |
| Windham        | Mar 11, 2013  | July 31, 2013 |
| <u>Round 3</u> |               |               |
| Easton         | Sept 22, 2013 | Feb 9, 2014   |
| Redding        | Sept 22, 2013 | Feb 9, 2014   |
| Trumbull       | Sept 22, 2013 | Feb 9, 2014   |
| Ashford        | Sept 24, 2013 | Feb 11, 2014  |
| Chaplin        | Sept 24, 2013 | Feb 11, 2014  |
| Hampton        | Sept 24, 2013 | Feb 11, 2014  |
| Pomfret        | Sept 24, 2013 | Feb 11, 2014  |
| Greenwich      | Oct 2, 2013   | Feb 18, 2014  |
| Newtown        | Sept 24, 2013 | Feb 28, 2014  |
| Manchester     | Oct 3, 2013   | Feb 28, 2014  |
| West Hartford  | Sept 30, 2013 | Feb 18, 2014  |
| West Haven     | Nov 13, 2013  | Apr 8, 2013   |
| Hamden         | Nov 18, 2013  | Feb 11, 2014  |
| Easton         | Sept 22, 2013 | Feb 9, 2014   |
| Trumbull       | Sept 22, 2013 | Feb 9, 2014   |
| <u>Round 4</u> |               |               |
| Tolland        | Apr 23, 2014  | Sept 16, 2014 |
| Torrington     | Apr 24, 2014  | Sept 16, 2014 |
| Simsbury       | Apr 29, 2014  | Sept 23, 2014 |
| Essex          | Apr 29, 2014  | Sept 23, 2014 |
| Montville      | May 1, 2014   | Sept 23, 2014 |
| Brookfield     | May 6, 2014   | Sept 30, 2014 |
| Bloomfield     | May 6, 2014   | Sept 30, 2014 |
| Farmington     | May 14, 2014  | Oct 7, 2014   |
| Haddam         | May 15, 2014  | Oct 7, 2014   |
| Killingworth   | May 15, 2014  | Oct 7, 2014   |
| East Lyme      | May 22, 2014  | Oct 14, 2014  |
| Weston         | June 24, 2014 | Nov 14, 2014  |
| <u>Round 5</u> |               |               |
| Avon           | Nov 20, 2014  | Apr 10, 2015  |
| Griswold       | Dec 8, 2014   | Apr 28, 2015  |
| Milford        | Dec 3, 2014   | Apr 23, 2015  |
| Southbury      | Nov 19, 2014  | Apr 9, 2015   |
| Old Lyme       | Dec 4, 2014   | Apr 24, 2015  |
| Lyme           | Nov 18, 2014  | Apr 8, 2015   |
| South Windsor  | Nov 10, 2014  | Mar 31, 2015  |
| Woodstock      | Dec 3, 2014   | Apr 23, 2015  |
| Burlington     | Nov 19, 2014  | Apr 9, 2015   |
| East Granby    | Dec 2, 2014   | Apr 22, 2015  |
| Suffield       | Dec 2, 2014   | Apr 22, 2015  |
| Windsor        | Dec 2, 2014   | Apr 22, 2015  |
| Windsor Locks  | Dec 2, 2014   | Apr 22, 2015  |
| New Canaan     | Dec 2, 2014   | Apr 22, 2015  |
| New Hartford   | Nov 17, 2014  | Apr 7, 2015   |

**Table EC.2** Summary statistics for boundary analysis

|                                      | Mean    | S.D.    | Min.    | Max.    |
|--------------------------------------|---------|---------|---------|---------|
| Percent installed (%)                | 1.17    | 1.04    | 0.00    | 7.66    |
| Median household income (\$)         | 98,897  | 31,411  | 56,288  | 241,800 |
| Median number of rooms in homes      | 6.46    | 0.836   | 4.36    | 9.00    |
| Median home values (\$)              | 374,874 | 192,696 | 175,877 | 998,264 |
| Density (owner-occupied houses/area) | 83.7    | 84.0    | 7.55    | 467.4   |

*Notes:* There are 152 observations for all of the variables (no missing values), where an observation is a municipality x zone pair. Data are from one year after the period listed for each of the Solarize campaigns in Table EC.1. All dollars are nominal dollars.

**Table EC.3** Evidence of Boundary Effects

|                            |                   |                         |                        |
|----------------------------|-------------------|-------------------------|------------------------|
| Boundary Buffer            | -0.405<br>(0.166) | -0.416<br>(0.156)       | -0.413<br>(0.107)      |
| Control: Density           |                   | -0.002<br>(0.001)       | -0.001<br>(0.002)      |
| Control: Income            |                   | -5.52e-06<br>(4.81e-06) | -0.00001<br>(9.81e-06) |
| Control: Rooms             |                   | 0.483<br>(0.141)        | 0.865<br>(0.467)       |
| Control: Home Value        |                   | -1.81e-06<br>(6.97e-07) | 9.88e-07<br>5.40e-06   |
| Constant                   | 1.372<br>(0.141)  | -0.326<br>(0.723)       | -2.60<br>(2.40)        |
| Municipality Fixed Effects | No                | No                      | Yes                    |
| R-squared                  | 0.038             | 0.185                   | 0.825                  |
| N                          | 152               | 152                     | 152                    |

*Notes:* Dependent variable is market share of owner-occupied homes that have installations one year after the Solarize campaigns (mean=0.1). An observation is a municipality x zone pair. Robust standard errors in parentheses.

**Table EC.4** Robustness Check: Empirical Results Using Non-Solarize Towns

|                            |                   |                   |                   |
|----------------------------|-------------------|-------------------|-------------------|
| Boundary Buffer            | -0.084<br>(0.524) | -0.084<br>(0.228) | -0.084<br>(0.040) |
| Constant                   | 0.862<br>(0.359)  | -15.70<br>(4.42)  | 23.57<br>(2.22)   |
| Control Variables          | No                | Yes               | Yes               |
| Municipality Fixed Effects | No                | No                | Yes               |
| R-squared                  | 0.002             | 0.874             | 0.997             |
| N                          | 14                | 14                | 14                |

*Notes:* Dependent variable is market share of owner-occupied homes that have installations one year after the Solarize campaigns (mean=0.1). An observation is a municipality x zone pair. The municipalities included are: Bristol, Hamden, Milford, New Haven, Stonington, Stratford, and Waterbury, and the analysis is performed during the period of Round 3, when none of these municipalities had received a Solarize campaign. Robust standard errors in parentheses.
